# Supplementary material for: Widespread Epigenetic Abnormalities Suggest a Broad DNA Methylation Erasure Defect in Abnormal Human Sperm
Source: PubMed Central journal article supplement (PMC2100168; doi:10.1371/journal.pone.0001289), 2007-12-12
Supplement: pone.0001289.s001.pdf [file pone.0001289.s001.pdf]

**Table S1. Primers, probes and reaction IDs for 294 MethyLight Assays; C(t) values of prescreen sperm DNA.** Group A: used in screening procedure and analysis of 65 study samples. Group B: used only in screening procedure. Group C: new assays designed to DMRs of maternally imprinted genes and used only in analysis of 65 study samples.

| GROUP    | REACTI<br>ON ID | GENE<br>SYMBOL | PS<br>Sample<br>C(t)<br>Value | Amplicon<br>Location<br>Start (UCSC<br>Genome<br>Coordinates) | Amplicon<br>Location End<br>(UCSC<br>Genome<br>Coordinates) | Forward primer Sequence             | Reverse Primer Sequence         | Probe Oligo Sequence                        |
|----------|-----------------|----------------|-------------------------------|---------------------------------------------------------------|-------------------------------------------------------------|-------------------------------------|---------------------------------|---------------------------------------------|
| <b>A</b> | HB-189          | UIR*           | 20.12                         | N/A                                                           | N/A                                                         | TTAGACGATGGGTGGTTAAGTAGAGAC         | CCAACCGCTACCTTAACCTC            | 6FAM-CTACCCGACCCACGCGG-BHQ-1                |
|          | HB-296          | ALU            | 21.98                         | N/A                                                           | N/A                                                         | GGATTATAGGCGCGCTTATT                | TCACACCCGTAATCCGAACA            | 6FAM-ACCGAAACGAACGAATCACGAAATCAAA-BHQ-1     |
|          | HB-301          | SP23           | 23.73                         | N/A                                                           | N/A                                                         | GGAGTTAATTTATGGTAGAGAGGATACGTTAT    | AACCTTTAAAAACGCGAACCTTA         | 6FAM-CACCTTTCGCTACGACCTTACGCTCA-BHQ-1       |
|          | HB-244          | TFF1           | 26.23                         | 42656349                                                      | 42656489                                                    | ATGTTGATTAGAGTTTTGTAGTTTTAAATGAT    | CCGTTTCGTAATAATCCCTAATACTT      | 6FAM-TATCCTAATACCATCGACGCTCCCTCAAAAAA-BHQ-1 |
|          | HB-200          | LZTS1          | 26.61                         | 20154741                                                      | 20154825                                                    | GCGGCGTTGTAGGGACG                   | CGCGCGCTAACTCTTCTACG            | 6FAM-ATTACCGCTTTAAACTCCGAACCTTCA-BHQ-1      |
|          | HB-263          | PSEN1          | 27.12                         | 72672585                                                      | 72672701                                                    | TGTGATGTAGTTGGTTCGTAATAGGTAT        | AACCCCTATATAAATTAACCCCAACGTA    | 6FAM-ACTTCTCCGACATACAACGATAACCATCT-BHQ-1    |
|          | HB-257          | BDNF           | 27.14                         | 27700880                                                      | 27700949                                                    | AGTGGTTGCGTAAGTTGGGAA               | TCATCTTTTCGCTCCAAAT             | 6FAM-CTTTCGCAACACGTAACCTCTTCG-BHQ-1         |
|          | HB-237          | CGA            | 27.18                         | 87861458                                                      | 87861547                                                    | GGGTTTTTGTAGGATGTGTTAGG             | AACACAAATTAATAAACTCATAAAACGAAAC | 6FAM-TCCCTCTTCGAATCCACAATCAACCG-BHQ-1       |
|          | HB-400          | GP2            | 27.24                         | 20246283                                                      | 20246417                                                    | GATTTATTTTCGATGAGAATATAAAGCGT       | CTCCCATCATACCTATACCAATTAATA     | 6FAM-TTGTGGGTCGTTTTTTA-MGBNFQ               |
|          | HB-085          | SASH1          | 28.05                         | 148705695                                                     | 148705778                                                   | TAGTTCGTGGTTATTTAGATTCGAGGT         | GCGCTACATACCCGACG               | 6FAM-CCGCGAAAACCTTCGCAACG-BHQ-1             |
|          | HB-325          | GATA4          | 28.31                         | 11645081                                                      | 11645162                                                    | TTACGTTGTGGCGTCGTAATG               | CCACGTACCCCGTAAAACTTCA          | 6FAM-CGCAACATTACACAAAACTCGCCT-BHQ-1         |
|          | HB-208          | SERPINB5       | 28.84                         | 59295148                                                      | 59295227                                                    | GAAAAGGAATAGGTAAGCGAGGAGT           | ATAAACCCCGCTACTTCTACCCA         | 6FAM-CAGATCGCTCCACATCCAACTTT-BHQ-1          |
|          | HB-403          | C9             | 30.05                         | 39400223                                                      | 39400378                                                    | ATGTTTTATTAGATTTGTTTTGTTATTTTATTCGT | CAAACAAAAATAACTAACTCACCTAATCG   | 6FAM-TTAGTTTTCGCGAGTTTTGTAG-MGBNFQ          |
|          | HB-289          | SAT2CHRM1      | 30.16                         | N/A                                                           | N/A                                                         | TCGAATGGAATTAATATTTAACGGAAAA        | CCATTCGAATCCATTGATAATTCT        | 6FAM-CGATTCCATTGATAATTCGTTT-MGBNFQ          |
|          | HB-086          | ALU            | 30.20                         | N/A                                                           | N/A                                                         | GGATTATAGGCGCGCTTATT                | TCACACCCGTAATCCGAACA            | 6FAM-ACCGAAACGAACGAATCACGAAATCAAA-BHQ-1     |
|          | HB-273          | PTPN6          | 30.23                         | 6930354                                                       | 6930436                                                     | GATGGCGGTGATAATTGTTATCG             | ATCAAAACAAAACATATAAACGCCATT     | 6FAM-AACACAACGCCGACATCCAACAAA-BHQ-1         |
|          | HB-071          | RNR1           | 30.67                         | N/A                                                           | N/A                                                         | CGTTTTGGAGATACGGGTCG                | AAACAACGCCGAACCGAA              | 6FAM-ACCGCCGTACCACACGCAAA-BHQ-1             |
|          | HB-058          | MTHFR          | 30.89                         | 11797288                                                      | 11797377                                                    | TGGTAGTGAGAGTTTTAAAGATAGTTTCGA      | CGCCTCATCTTCTCCCGA              | 6FAM-TCTCATACCGCTCAAAATCCAAACCCG-BHQ-1      |
|          | HB-076          | ICAM1          | 31.03                         | 10242630                                                      | 10242709                                                    | GGTTAGCGAGGGAGGATGATT               | TCCCCTCCGAAACAAATACTACAA        | 6FAM-TTCCGAACTAACAAATACCCGAACCGAAA-BHQ-1    |
|          | HB-239          | CYP1B1         | 31.71                         | 38215493                                                      | 38215577                                                    | CGGCGTATTGGAGTGGTT                  | CCCGACAATACTTAAACACAAAA         | 6FAM-CGCAACTAACCTAAAATTTCCCGCTAA-BHQ-1      |
|          | HB-051          | ABCB1          | 32.01                         | 86874884                                                      | 86874962                                                    | TCGGGTTCGGAGTAGTTATTTG              | CGACTATACTCAACCCACGCC           | 6FAM-ACGCTATTCTACCCAACCAATCAACCTCA-BHQ-1    |
|          | HB-174          | SFN            | 32.04                         | 26874056                                                      | 26874136                                                    | GAGGAGGGTTCGGAGGAGAA                | ATCGCACACGCCCTAAAAT             | 6FAM-TCTCCGATACTACGCACCTCGAA-BHQ-1          |
|          | HB-330          | LINE1          | 32.10                         | N/A                                                           | N/A                                                         | GGACGTAATTTGAAAAATCGGG              | AATCTCGCGATACGCCGTT             | 6FAM-TCGAATATTGCGTTTTTCGGATCGGTTT-BHQ-1     |
|          | HB-212          | PAX8           | 32.31                         | 113709183                                                     | 113709259                                                   | CGGGATTTTTTGTCTGATTTGA              | ACCTTCCCATACCTACCTCCG           | 6FAM-ACGAACAATTCACGAACCAAAACCTCT-BHQ-1      |
|          | HB-251          | NTF3           | 32.47                         | 5473982                                                       | 5474055                                                     | TTTCTTTTTGTATTTTATGGAGGATT          | CCGTTTCCGCGTAATATTC             | 6FAM-TCGCCACCAGAACTACCCACG-BHQ-1            |
|          | HB-161          | MINT1/SV2C**   | 33.06                         | 75415734                                                      | 75415861                                                    | GGGTTGAGGTTTTTTGTTAGCG              | CCCCTCTAAACTTCACAACTCCG         | 6FAM-CTACTTCGCTAACCTAACGCACAACAAACG-BHQ-1   |
|          | HB-205          | MT1A           | 33.93                         | 55229471                                                      | 55229550                                                    | CGTGTTCCTGTTATTGTGTACG              | CTCGCTATCGCCTTACCTATCC          | 6FAM-TCCACACATAAATCCCTCGAACCCACT-BHQ-1      |
|          | HB-345          | IGF2           | 34.04                         | N/A                                                           | N/A                                                         | TGACGAGGTTAGTGAGGGACGGC             | CAAACCTCTCGATCCACCAAAAATAATCTAT | 6FAM-AAAAATTCAC/TTTCCCCAAAAA-MGBNFQ         |
|          | HB-053          | SMAD3          | 34.06                         | 65145579                                                      | 65145653                                                    | CGTGAAGCGTTTGTGGGT                  | TTAACCCGCTTCTCGCAC              | 6FAM-TCCTCCTACCGGTTCTACTCGCCTTCTT-BHQ-1     |
|          | HB-199          | PLAGL1         | 34.15                         | 1443711135                                                    | 144371211                                                   | ATCGACGGGTTGAATGATAAATG             | CTCGACGCAACCTCTCTT              | 6FAM-ACTACCGCGAACGACAAAACCCACG-BHQ-1        |
|          | HB-144          | HRAS           | 34.22                         | 524232                                                        | 524327                                                      | GAGCGATGACGGAATATAAGTTGG            | CGTCCAAAAATAATTCTAATCAACTAA     | 6FAM-CACTCTTACCCACACCGCCGACG-BHQ-1          |
|          | HB-219          | LDLR           | 34.28                         | 11060912                                                      | 11061014                                                    | GATATCGGTTTTTAATTCGTGAAGTT          | TTCACGAAAAACCAATACAA            | 6FAM-ATCAAATCGCTACCTAACGACACTTTCG-BHQ-1     |
|          | HB-223          | CYP27B1        | 35.07                         | 56446731                                                      | 56446808                                                    | GGGATAGTTAGAGAGAACGGATGTTT          | CCGAATATAACCACACCGCC            | 6FAM-CCAACCTCACTCGCTTTTCTTATTTC-A-BHQ-1     |

|          |        |                    |       |           |           |                                |                                      |                                                         |
|----------|--------|--------------------|-------|-----------|-----------|--------------------------------|--------------------------------------|---------------------------------------------------------|
|          | HB-270 | HOXA10             | 35.16 | 26987339  | 26987422  | TGTATTGATGGGTTAGGAGACGTATT     | CCCACCAACCACGTTAAACA                 | 6FAM-CAACTCCCACCTTCGAACCAAAATATCG-BHQ-1                 |
|          | HB-311 | IFNG               | 37.86 | 66839949  | 66840111  | TGAAGAGTTAATATTTTATTAGGGCGAA   | TTCCTTTAAACTCCTTAAATCCTTTAAGC        | 6FAM-ACAAACCCATTATACCCACCTA-MGBNFQ                      |
| <b>B</b> | HB-145 | TFPI               | 30.47 | 42659974  | 42660121  | TAAGGTTACGGTGGTTATTTTCGTGA     | ACCTTAATCCAAATCTACTCATATCTAAAA       | 6FAM-<br>CCCTCCCGCCAAAATAAATACTATACTACTACAAAA-<br>BHQ-1 |
|          | HB-351 | IGF2               | 34.05 | N/A       | N/A       | GACGAGGTTAGTGAGGGACGGC         | AACTCCTCGATCCACCCAAAATAATATCTATAA    | 6FAM-AAAAATTAC/TTCGCCAAAAA-MGBNFQ                       |
|          | HB-346 | IGF2               | 34.08 | N/A       | N/A       | TTTGACGAGGTTAGTGAGGGACGGC      | CCAAACTCCTCGATCCACCCAAAATAATATCTATAA | 6FAM-AAAAATTAC/TTCGCCAAAAA-MGBNFQ                       |
|          | HB-349 | PTPN6              | 34.38 | 6931106   | 6931193   | TTGGTTCGGTTTAGTCGTAAGAATTA     | ATAACCCAAAATACCCGAAATTACGAA          | 6FAM-CCCACCTACCTAACGAAAAACGAAAAATCACC-BHQ-1             |
|          | HB-348 | PTPN6              | 35.09 | 6930726   | 6930844   | TAAAGGGTTCGGTCGCGT             | CAACTCCCAATACCCGAACCG                | 6FAM-CTCACCACCCCGATAATCCCAATTCTAAA-BHQ-1                |
|          | HB-072 | ALU                | 36.12 | N/A       | N/A       | AGGTCGAGGTCGGCGG               | CCACGCCGACTAATTTTATATCTT             | 6FAM-CAAACCTAATCTCAAACCTCCGACCTCAAACGA-BHQ-1            |
|          | HB-302 | HTRS               | 36.23 | N/A       | N/A       | GGCGGTTTCGGAGTAAGTCG           | TCGCAACATCTTACTACCTTCGAAA            | 6FAM-AAACACCGACCGAACTTACTCCGCTCC-BHQ-1                  |
|          | HB-306 | TNFRSF10A          | 36.58 | 23138801  | 23138877  | AGTTTTTGGTATTTAGTAGGCGTTCCG    | CAAACCCCGCAATAACCTCTATATC            | 6FAM-ATTCGCCACCCATCCGTCCA-BHQ-1                         |
|          | HB-061 | S100A2             | 36.82 | 150354273 | 150354354 | TGTTTGAAGTCGTAAGTAGGGCGT       | CGTATCATTACAATACCGACTCCT             | 6FAM-ATCCTCCCTTCTTATCCGCCAAACCCCT-BHQ-1                 |
|          | HB-332 | IGF2               | 37.05 | N/A       | N/A       | CGAGGTTAGTGAGGGACGGC           | CCTCGATCCACCCAAAATAATATCTATAA        | 6FAM-AAAAATTCA/TTCGCCAAAAA-MGBNFQ                       |
|          | HB-242 | ONECUT2            | 37.47 | 53253467  | 53253547  | ACGGCGGTTAAGCGTAATTAATT        | CCACAACTAATAAATCTCCCGTA              | 6FAM-CCCGCTCCCGAAACACTACGA-BHQ-1                        |
|          | HB-333 | IGF2               | 38.01 | N/A       | N/A       | CGAGGTTAGTGAGGGACGGC           | CCTCGATCCACCCAAAATAATATCTATAA        | 6FAM-AAAAATTCA/TTCGCCAAAAA-NFQMB                        |
|          | HB-395 | 2C64 /<br>BC031882 | 38.04 | 47124419  | 47124488  | TGTTTTTAGGGTTTTGGCGTTAAG       | TACAAACGCGACCCGCA                    | 6FAM-AAACGCCAACGCGGACTCTAAA-BHQ-1                       |
|          | HB-262 | PSEN1              | 38.06 | 72673243  | 72673319  | GTCGGGTGGAGAGAGATTTCG          | AACACTACGCCCTAAAACGTC                | 6FAM-TCGAACAAACAATTTCCGAACCAAACT-BHQ-1                  |
|          | HB-310 | CLDN7              | 38.07 | 7106456   | 7106530   | GGGTTGTAGGTTTCGAGGTTGC         | CACCTATCCGCCGCAC                     | 6FAM-CTAACTACCTCCGAACCCACTCTACTACGA-BHQ-1               |
|          | HB-269 | CDKN2A             | 38.34 | 21961094  | 21961191  | GCGTTCGAGTGGCGGA               | CTCCCGAACAACGTCGTACAC                | 6FAM-CAATTAACCTCCGCCGTAACAAACAA-BHQ-1                   |
|          | HB-404 | HDFG               | 39.02 | 153533994 | 153534099 | GACGTCGTGTTTCGTTAGGTGTTT       | CTTATAAATCTCCGACTTTTCTCTATCG         | 6FAM-TTCCAAACCCACCCGCGAAT-BHQ-1                         |
|          | HB-193 | COL1A2             | 39.70 | 93668865  | 93668953  | CGGTAGTAGGAGGTTTCGGTTAAGT      | CCTAAATCACCGAGCAAAATATCA             | 6FAM-CGAACCGCAACATACCAATCTGAACCAATACCT-BHQ-1            |
|          | HB-048 | DNAJC15            | 40.06 | 42495746  | 42495826  | TTTCGGGTCGTTTTGTTATGG          | ACTACAAATACTCAACGTAACGCAAACT         | 6FAM-TCGCCAACTAAACGATAACACCACGAACA-BHQ-1                |
|          | HB-202 | LPHN2              | 40.07 | 81978452  | 81978551  | GAGGATTTAGCGCGTAGTGAGTG        | AATCCCGAATCTACCTCCA                  | 6FAM-CCCATAACACACCCATCAACCGCTAA-BHQ-1                   |
|          | HB-142 | MBD2               | 40.11 | 50005060  | 50005138  | AGGCGGAGATAAGATGGTCTGT         | CCCTCTACCCGAAACGTAAC                 | 6FAM-CGACCACCGCTCTTAAATCTCCAAA-BHQ-1                    |
|          | HB-241 | SYK                | 40.15 | 90643286  | 90643370  | AGGGTCGTTGGGTGTTTGTG           | AACATAAACCGCATCGATCCC                | 6FAM-CGCCAACGCGATAACTTCTATAACTACCCAA-BHQ-1              |
|          | HB-207 | MT3                | 40.21 | 55180944  | 55181018  | GGTTTTAGGTTTATGTCGAGGAGA       | CCGCGCTCCAATTACTTA                   | 6FAM-AAAACCCGTTCCCGCTCCAACTACTA-BHQ-1                   |
|          | HB-154 | MYOD1              | 40.33 | 17697363  | 17697435  | GAGCGCGTAGTTAGCG               | TCCGACACGCCCTTCC                     | 6FAM-CTCCAACACCCGACTACTATATCCGCCAAA-BHQ-1               |
|          | HB-159 | MGMT               | 40.68 | 131155782 | 131155872 | CTAACGTATAACGAAAATCGTAACAACC   | AGTATGAAGGGTAGGAAGAATTCGG            | 6FAM-CCTTACTCTAAATACCAACCCAAACCCG-BHQ-1                 |
|          | HB-176 | RARB               | 40.70 | 25444834  | 25444919  | TTTATCGAGGTTGTTTGGAGGATG       | CGAATCTACCCGACGATAC                  | 6FAM-CTCGAATCGTTCGGTTCTCGACAT-BHQ-1                     |
|          | HB-312 | IFNG               | 40.93 | 66839601  | 66839685  | TTGGTTTAATTTTTTCGGAACGA        | CAACCAAAAAACCCAAAACGAT               | 6FAM-AAACCAAAATATAACTTATATATTTCA-MGBNFQ                 |
|          | HB-279 | SFRP2              | 41.09 | 155068371 | 155068471 | TTTATAATTTTGAATTTTTTACGGTATTGG | GAAACCGCTCGCGAACT                    | 6FAM-CTCGAATCTCCAACCCGTTCAACAA-BHQ-1                    |
|          | HB-258 | BDNF               | 41.12 | 27678453  | 27678525  | CGTATCGGGTTGGTTTTTTGTT         | CGCCCGCTCGCTATCC                     | 6FAM-CCGTAACCGCTCGAACTCCCGA-BHQ-1                       |
|          | HB-391 | GPR88              | 41.14 | 100717612 | 100717678 | CGCGGGTGTATTAGTTGCGT           | GCGACGACCGCTACCGTTA                  | 6FAM-CCGCCACAACCGTACCCGCAATATC-BHQ-1                    |
|          | HB-210 | PAX8               | 41.86 | 113752743 | 113752811 | ATCGATCGGTTTTTATTCGTTGAG       | ACCAATCCGCGACTACG                    | 6FAM-ACCTCGCCAAACCCATCTCCCAAAA-BHQ-1                    |
|          | HB-052 | PTTG1              | 42.07 | 159781430 | 159781499 | GCGTTCGTTTATCGCGGT             | CCGCGACCTCCATT                       | 6FAM-ACTACGCAAACTTAAACAACCGCATTA-BHQ-1                  |
|          | HB-393 | LAMB1              | 42.08 | 107237637 | 107237723 | GGCGGGCGGTCGTAAT               | CGCAAATTCGACTTCAAAACA                | 6FAM-AAAATAAAACCGAAACCTCACCCGATCCTC-BHQ-1               |
|          | HB-110 | ERCC1              | 42.14 | 50618574  | 50618664  | GGCGGAGTCGAAGGTGG              | CTCCGAAAACCTCCATAACGTCAA             | 6FAM-CCCAACGCTAAAAACTTATAACGCCACG-BHQ-1                 |
|          | HB-069 | CADM1              | 43.02 | 114880288 | 114880369 | GGGTTTCGGAGGTAGTTAACGTC        | CACATAAATCCGCTCGACAACAC              | 6FAM-ACACTCGCCATATCGAACACCTACTCAA-BHQ-1                 |
|          | HB-065 | PTGS2              | 43.03 | 183381471 | 183381545 | CGGAAAGCTTCGGGTAAG             | AATTCACCGCCCAAC                      | 6FAM-TTTCGCCAAAATATCTTTTCTTTCGCA-BHQ-1                  |
|          | HB-068 | VDR                | 43.03 | 46585350  | 46585440  | ACGTATTGGTTTAGGCGTTTCGTA       | CGTTCAACCTATATTAATCGAAAATACA         | 6FAM-CCCACCTTCTACCGTAATTCTACCCAA-BHQ-1                  |
|          | HB-062 | CLIC4              | 43.09 | 24817200  | 24817272  | GGCGGTGTTGAGGAGTTGA            | CCGATTCGCGGCTACTAC                   | 6FAM-CGCTAAACTATCCGAAATCGAACTAACCCG-BHQ-1               |
|          | HB-234 | PITX2              | 44.06 | 111915835 | 111915919 | GGAGTGCAGGTGACGTTAGTAGAGATTT   | AACCCGCAACCGAACT                     | 6FAM-CGCCCGCGGCCACTATACA-BHQ-1                          |
|          | HB-278 | SMAD6              | 44.08 | 64781526  | 64781629  | ATGTTAGTTTATAGATATTTTGGCGGTTTC | CGACCCTACAATAAACGTAATCTCTCT          | 6FAM-AAACCTTATTTACGCAACAATCAACGCCG-BHQ-1                |
|          | HB-103 | RPA2               | 44.15 | 27925472  | 27925546  | TGGCGGCAATTTGAGTACG            | CGTATAATCCACCTCGTCA                  | 6FAM-CGCGACTTCTACCGTACTTCTTTATTCG-BHQ-1                 |
|          | HB-253 | DRD2               | 44.16 | 112850580 | 112850649 | GAAGTCGGAAATTTTGGTCCG          | ATCTCGAAAAAACACTTCCCCC               | 6FAM-ACACCAAAACCGGAAACCCGAACT-BHQ-1                     |
|          | HB-254 | GABRA2             | 44.39 | 46233296  | 46233369  | TCGTCGGAGGAGCGGA               | CAACTCTCGAAAAACCCAAACA               | 6FAM-ACGACCTCGAAAAACAACCCGAACTACG-BHQ-1                 |
|          | HB-256 | GAD1               | 44.66 | 171500487 | 171500569 | CGATTGGTTCGGCGTAGAAA           | CCCTCCGATATACAAAACCC                 | 6FAM-CCCGCAAACTCTCGTCTCTTTACAA-BHQ-1                    |
|          | HB-327 | GATA3              | 44.66 | 8136301   | 8136380   | TGTATCGGGACGGAATCGTT           | ACGCGCGCTTAACCCCTT                   | 6FAM-AAATATAACCGGACTCTACCAATTCATTCG-BHQ-1               |
|          | HB-184 | SEZ6L              | 45.06 | 24889734  | 24889836  | GCGTTAGTAGGGAGAAAAACGTTTC      | ATACCAACCGCTCCTTAACC                 | 6FAM-CCGTCGACCTCAAAAATTTAACGCCA-BHQ-1                   |

|        |                   |       |           |           |                                  |                                   |                                                        |
|--------|-------------------|-------|-----------|-----------|----------------------------------|-----------------------------------|--------------------------------------------------------|
| HB-040 | CCND2             | 45.09 | 4252120   | 4252184   | GGAGGGTCGGCGAGGAT                | TCCTTCCCAGAAAACATAAAA             | 6FAM-CACGCTCGATCCTTCGCCCG-BHQ-1                        |
| HB-259 | NEUROD1           | 45.88 | 182370725 | 182370806 | GTTTTTTCGCTGGCGGAAT              | CCGCGCTTAACATCACTAACTAAA          | 6FAM-CGCGCGACCACGACACGAAA-BHQ-1                        |
| HB-201 | SFRP1             | 46.02 | 41286207  | 41286276  | GAAATTCGTTCGGGAGGGA              | AAACGAAACCCTCGTTTACC              | 6FAM-CCGTACCGACGCGAAAACCAAT-BHQ-1                      |
| HB-247 | THBS1             | 46.52 | 37659935  | 37660009  | GTTTTGAGTTGGTTTTACGTTTCGTT       | CGACGCACCAACCTACCG                | 6FAM-ACGCCGCGCTCACCTCCCT-BHQ-1                         |
| HB290  | SATALPHACH<br>RM1 | 47.48 | N/A       | N/A       | TGATGGAGTATTTTTAAAAATACGTTTGTAGT | AATTCATAAAAATATTCCTCTCAATTACGTAAA | 6FAM-TATCCCGTTTCCAACGAA-MGBNFQ                         |
| HB-268 | HOXA1             | 47.90 | 26908602  | 26908684  | TTGTTTATTAGGAAGCGGTCTGTC         | TCGAACCATAAAAATACAACCTTTCCA       | 6FAM-TCGTACGGCATCAACGCCAACAAATTA-BHQ-1                 |
| HB-248 | TYMS              | 48.58 | 647871    | 647946    | CGGCGTTAGGAAGGACGAT              | TCTCAAATAACGCGCCTACAT             | 6FAM-CCGAATACCGACAAAATACCGATACCCGT-BHQ-1               |
| HB-206 | MT2A              | 48.99 | 55199620  | 55199708  | GCGTTTTTCGTCGTGTATAGTTT          | TTCCCAAATCCCGCTTICA               | 6FAM-CGCGCGTAAACGACTCAAATTCG-BHQ-1                     |
| HB-162 | CACNA1G           | 49.10 | 45991745  | 45991815  | GTCGTCGGCGTTATTTAGAAAAGTT        | CACCGACGCCAACACA                  | 6FAM-ACGCTCCGCTCCCGAATACCCA-BHQ-1                      |
| HB-113 | NDUFA12L          | 49.12 | 60277058  | 60277170  | GGTTAAGGCGTTAGAGTCGGG            | TCATACGACACTTAAAATATCACCGAAA      | 6FAM-CCCTTCACTCTAACATCGAAACCTACCCG-BHQ-1               |
| HB-215 | TFAP2A            | 49.57 | 10493365  | 10493490  | CACCCCATATACGCGCTAA              | GGTCGTTACGTTTCGGGTAGTTTA          | 6FAM-CGCGCTCACACGCTCAAAAACCT-BHQ-1                     |
| HB-041 | FHIT              | None  | 61211898  | 61211972  | GGCGCGGTTTGGG                    | CGCCCCGTAAACGACG                  | 6FAM-CACTAAACTCCGAAATAATAACCTAACGCGCG-BHQ-1            |
| HB-042 | SOCS1             | None  | 11256473  | 11256558  | GCGTCGAGTTCGTGGGTATTT            | CCGAAACCATCTCACGCTAA              | 6FAM-ACAATTCGGCTAACGACTATCGCGCA-BHQ-1                  |
| HB-043 | DIRAS3            | None  | 68228349  | 68228434  | GCGTAAGCGGAATTTATGTTTGT          | CCGCGATTTTATATTCGACTT             | 6FAM-CGCACAAAACGAAAATACGAAAACGCAAA-BHQ-1               |
| HB-044 | RASSF1            | None  | 50353155  | 50353219  | ATTGAGTTGCGGGAGTTGGT             | ACACGCTCCAACCGAATACG              | 6FAM-CCCTTCCCAACGCGCCCA-BHQ-1                          |
| HB-045 | BRCA1             | None  | 38530918  | 38531006  | GAGAGGTTGTTGTTTACGCGTAGTT        | CGCGCTATCGCAATTTAAT               | 6FAM-CCGCGCTTTTCCGTTACCCAGCA-BHQ-1                     |
| HB-046 | DAPK1             | None  | 87342485  | 87342552  | TCGTCGTCGTTTCGGTTAGTT            | TCCCTCCGAAACGCTATCG               | 6FAM-CGACCATAAACGCCAACGCGG-BHQ-1                       |
| HB-047 | TWIST1            | None  | 18929791  | 18929865  | GTAGCGCGGCGAACGT                 | AAACGCAACGAATCATAACCAAC           | 6FAM-CCAACGCACCCAAATCGTAAACGA-BHQ-1                    |
| HB-049 | DPH1              | None  | 1880101   | 1880170   | ACGCGGAGAGCGTAGATATTG            | CCGCCAACGAATATCC                  | 6FAM-CCCGCTAACCGATCGACGATCGA-BHQ-1                     |
| HB-050 | CDH1              | None  | 67328528  | 67328623  | AGGGTTATTCGCGTTTATGCC            | TTCACCTACCGACCACAACCA             | 6FAM-CTAACGACCCGCCACCCTGA-BHQ-1                        |
| HB-054 | CXADR             | None  | 17807103  | 17807169  | TACGCGGTTGGAGAAGTCG              | ATAAACTCGGTCCTTCCGA               | 6FAM-AACGACCCGAACCGAAGTACGAAACG-BHQ-1                  |
| HB-059 | CLDN1             | None  | 191522936 | 191523032 | CGGTGAGTCGTTTGAATACG             | ACGCAAAAACCGTAAACGCG              | 6FAM-GATTTAAAACAACCTCCGCCGCTCA-BHQ-1                   |
| HB-060 | PPARG             | None  | 12304350  | 12304465  | GCGTTCGCGTTCGTTTTTC              | CGCCCAAAACGACGAC                  | 6FAM-CCCGCTACCCGCGACGAAA-BHQ-1                         |
| HB-063 | STAT1             | None  | 191704255 | 191704343 | GCGTAGGATTCGGAAGGGTTA            | AACAAAACCCAAACCGCAACA             | 6FAM-AACGACCCCAACGCGCTCGAAAA-BHQ-1                     |
| HB-064 | SORBS3            | None  | 22479225  | 22479297  | GTTTCGGTTGTCGTTGGGTT             | ACGCCGACGAAGTCTACGC               | 6FAM-ACGACGCAATCAAACCCGCGA-BHQ-1                       |
| HB-066 | HSD17B4           | None  | 118816177 | 118816247 | TATCGTTGAGGTTTCGACGGG            | TCCAACCTTCGCATACTCAC              | 6FAM-CCCGCGCGATAACCAATACCA-BHQ-1                       |
| HB-067 | NR3C1             | None  | 142763209 | 142763279 | GGGTGGAAGGAGACGTCGTAG            | AAACTTCGGAACGCGCG                 | 6FAM-GTCCCGATCCCACTACTTCGACCG-BHQ-1                    |
| HB-070 | LTB4R             | None  | 23850461  | 23850536  | GCGTTGGTTTTATCGGAAGG             | AAACCGTAATTCGCGCTCG               | 6FAM-GACTCCCGCCAACTTCGCAAAA-BHQ-1                      |
| HB-073 | SYK               | None  | 90643560  | 90643636  | GGCGCGATATTGGGAG                 | GCGACTCTTCTCATTTTAAACAAC          | 6FAM-CCTTAACGCGCCGAACAAACG-BHQ-1                       |
| HB-074 | TERT              | None  | 1348267   | 1348382   | GGATTTCGCGGATATAGACGTT           | CGAAATCCGCGCGAAA                  | 6FAM-CCCAATCCCTCCGCCAGTAAAA-BHQ-1                      |
| HB-075 | CDH13             | None  | 81218210  | 81218312  | AATTTTCGTTCTGTTTGTGCGT           | CTACCCGTACCGAACGATCC              | 6FAM-AACGCAAAAACGCGCCGACA-BHQ-1                        |
| HB-077 | NCL               | None  | 232154778 | 232154864 | CGTGTCTGTTTCGGTTTCGTT            | ACCAAAAACCTCGGACCCGTC             | 6FAM-CCATAAAACCAATCGGAACTCTAACCCGT-BHQ-1               |
| HB-078 | CYP1B1            | None  | 38214997  | 38215082  | GTGCGTTTGGACGGGAGTT              | AACGCGACCTAACAAAACGAA             | 6FAM-CGCGCGACACCAAAACCGCT-BHQ-1                        |
| HB-079 | SLC6A20           | None  | 45812864  | 45812998  | AGGCGAATACGAAITGTAGCG            | TAAAACGACGCGCCTAACG               | 6FAM-CCGCGCACTAAAACCTACCGTACCGAA-BHQ-1                 |
| HB-080 | TNFRSF25          | None  | 6460427   | 6460495   | GCGGAATACGACGGGTAGA              | ACTCCATAACCTCCGACGA               | 6FAM-CGCCCCAAAACCTTCCGACTCCGTA-BHQ-1                   |
| HB-081 | CDKN2A            | None  | 21964732  | 21964801  | TGGAGTTTTCGGTTGATTGGTT           | AACAACGCCCGACCTCT                 | 6FAM-ACCCGACCCCGAACCGCG-BHQ-1                          |
| HB-082 | UNG               | None  | 107998395 | 107998490 | GTTTACGCGAGGGCGGTGA              | ACAACGACGACTATTTTAAACACGTA        | 6FAM-CCCGAATTTACCGAATCAAACCGCGA-BHQ-1                  |
| HB-083 | MBD4              | None  | 130641365 | 130641480 | TCGTGTTTATCGAGTAGGGTTTCG         | TCGATTACAACCCGATACCGTAA           | 6FAM-CACACCTTAAACGTTACGACCTAACTCG-BHQ-1                |
| HB-084 | MSH6              | None  | 47921669  | 47921753  | GGAGTGTTCGGTTTCGGTTAGT           | CTACCGCGACGCGCTAAA                | 6FAM-CCCTTCCCTACGCGCGGA-BHQ-1                          |
| HB-087 | OGG1              | None  | 9766425   | 9766556   | TAGGGTGGGCGGGTCG                 | CCGCGAAAACGCCCAA                  | 6FAM-CAATACCGACCAACCGCGCGA-BHQ-1                       |
| HB-088 | MUTYH/TOE1        | None  | 45474733  | 45474807  | TCGGGTGGATTTCGAGTTACG            | AAAATTAACCTCCCGGAACTCTA           | 6FAM-CGCGCCCGACTTCCGACG-BHQ-1                          |
| HB-089 | NTHL1             | None  | 2037891   | 2038004   | CGGGACGTCGTCGGAAG                | CCGACCTTTCGCCCAA                  | 6FAM-CGACCTCCGCGCAATACCG-BHQ-1                         |
| HB-090 | APEX1             | None  | 19993146  | 19993280  | CGTATTTGTATCGGTTTCGATGGTA        | GCGCATCTTCGACACG                  | 6FAM-CAAACGCGCTCTAATCAGTAACCAAT-BHQ-1                  |
| HB-091 | LIG3              | None  | 30331610  | 30331701  | GTCGCGGGTAGTTTACGACG             | CGACCTTAACTCTTACGCTACG            | 6FAM-CGCTACCTCCGCTCTAAAACCCGA-BHQ-1                    |
| HB-092 | XRCC1             | None  | 48771564  | 48771673  | CGTTGTTAAGGAACGTAGCGTTTT         | GCGCGAAACTCGAACCTTT               | 6FAM-CCAATCGCGCTCTCCAAAACG-BHQ-1                       |
| HB-093 | PARP1             | None  | 222902100 | 222902168 | CGGGTTTAGGGAGCGAGC               | AAACGACCCGGAACCCATA               | 6FAM-CGCTCCGAAAACCCGAAACCGA-BHQ-1                      |
| HB-094 | PARP2             | None  | 19881678  | 19881744  | GGCGGAGAGGTTTCGGAGT              | TGCTTCTTTCTAACTACCCGC             | 6FAM-CCCGCATACCGTCCCGGATA-BHQ-1                        |
| HB-095 | MSH2              | None  | 48542284  | 47542370  | TTTTAGTGGGAGGTACGGG              | AAACGATCCTCCGAAACCAAA             | 6FAM-CCGCACAAAACCAACGTTCCG-BHQ-1                       |
| HB-096 | MSH4              | None  | 75974790  | 75974880  | CGGATTTTAGGAGATTTATAGAGTCG       | CCGATCGCCCGAAC                    | 6FAMAACGTACCAAAAACAAATAAATACAAAAACCCCTA<br>AACCG-BHQ-1 |
| HB-097 | MSH5              | None  | 31815771  | 31815853  | TTCGTGGCGGTTCGGTTA               | CCGCCATCGCAACGTT                  | 6FAM-CCCGCTTTTCAATAACCTAAATCGTACA-BHQ-1                |
| HB-098 | PILRB             | None  | 99578411  | 99578495  | TCGTGGTTTGGCGTGGAT               | CCTAATACATCGAAATAACCGGTACC        | 6FAM-CCAACGATCGAAAACCGCCAAACA-BHQ-1                    |

|        |          |      |           |           |                                   |                                 |                                               |
|--------|----------|------|-----------|-----------|-----------------------------------|---------------------------------|-----------------------------------------------|
| HB-099 | MLH3     | None | 74587699  | 74587769  | TGATGATGGTTGCGCGTAGT              | CGACCGCAAACCCG                  | 6FAM-CGAAACCCCTCGCGCATCCGA-BHQ-1              |
| HB-100 | XPC      | None | 14195020  | 14195117  | GTCGGGTGCGTTATTCCGC               | CTACGCAATTCGCGTCCC              | 6FAM-ACCGCGCGTTTCCGAACCATATTACT-BHQ-1         |
| HB-101 | RAD23A   | None | 12917467  | 12917552  | TATCGATAACCGGGTATGGCGTT           | CGAAACTAAACTCCGCGTATAA          | 6FAM-TTACTCGACCCGACACGTAATCTCCTAAA-BHQ-1      |
| HB-102 | XPA      | None | 97539016  | 97539079  | CGCGGAGTTGTTTGTTCG                | CAACATCAATACCCGCTACCG           | 6FAM-CCGCTCGATACTCGCCCGCA-BHQ-1               |
| HB-104 | RPA3     | None | 7453370   | 7453448   | AGCGCGATTGCGGATTTAGG              | TTTCTCGACACCAATCAACGAA          | 6FAM-TCCAACTTCGCAATTAATACCGGAAA-BHQ-1         |
| HB-105 | ERCC2    | None | 50565643  | 50565727  | CGAGTTTTTCGAGGATGTTTACGA          | CCGACCGAACTATAACAAGAAAT         | 6FAM-ACCCGCCTCCCTCATAAATATTCACGAA-BHQ-1       |
| HB-109 | ERCC5    | None | 102296112 | 102296188 | TAAGCGTAGAAAATACGTTATGTGCG        | CCCGCTCGATTCCGCTCT              | 6FAM-CGACGCGCAAAACGAAACTCCG-BHQ-1             |
| HB-111 | ERCC4    | None | 13921544  | 13921615  | TCGACGGATTGTTATGGCG               | CCGTCAATATCGAACAAATTC           | 6FAM-CACCAACTATCGCTCGTACTCCAACAACG-BHQ-1      |
| HB-114 | ERCC6    | None | 50417137  | 50417262  | ACGTAAGTAGAAAGGCGTTGTTGAG         | CGACTCCGACTTCTACTAATACGAAA      | 6FAM-CCCGTAACGCATACGCCTAACTCAACG-BHQ-1        |
| HB-115 | XAB2     | None | 7600520   | 7600597   | GACGGATAGGTTTACGTTATGATTTT        | CGCATCTTCTAACGCCTCTATTIC        | 6FAM-ACTTCCGATCGCTAACGTCGCGAAA-BHQ-1          |
| HB-116 | DDB1     | None | 60857034  | 60857134  | GGGCGGAGGTAGCGGT                  | CCGTCGAAACTCGAACG               | 6FAM-CCAACAACGCGCAACGAACTCCA-BHQ-1            |
| HB-117 | MMS19L   | None | 99248168  | 99248271  | TTAGGTAGAAAGTCGGTAGGTACGTGA       | ATAACTCGAAACGAACTCTCCGC         | 6FAM-CGCCTCCCGAACCAATCTCCG-BHQ-1              |
| HB-126 | BRCA2    | None | 31787586  | 31787652  | CGTTACGCGGTTACGTGGT               | CCGCCTCTACCGCTAAATTT            | 6FAM-CGCGCCACAAACCCCGC-BHQ-1                  |
| HB-133 | DCLRE1C  | None | 15036151  | 15036236  | CGAAGCGGAGGTGATTTA                | AAAATCCGAAAACCGAAAACAA          | 6FAM-ATCCGATCGAATTTCTAAACGCCGCTACT-BHQ-1      |
| HB-139 | POLD1    | None | 55579103  | 55579174  | GGGACGCGGAGGATGC                  | GATCTAAACCGCGGATTTCTAT          | 6FAM-TCCTCCCACCTCGAATATTACGCG-BHQ-1           |
| HB-140 | BCL2     | None | 59136618  | 59136701  | TCGTATTTCGGGATTCGGTC              | AACTAAACGCAAAACCCCGC            | 6FAM-ACGACGCCGAAAACAACCGAAATCTACA-BHQ-1       |
| HB-141 | TSHR     | None | 80491125  | 80491211  | TTGAGGGTTAGAGGCGGGTA              | ACAACGAAAATCTCTCCAAAAATACA      | 6FAM-AACGACGACTTCGACCCGACCG-BHQ-1             |
| HB-143 | MBD4     | None | 130641481 | 130641560 | GCGTGGAATAGGCGGTT                 | AATCTAAATATTACGAAAACGCCCC       | 6FAM-AACGCCGCGCTACTTTCCGA-BHQ-1               |
| HB-146 | CCND1    | None | 69164885  | 69164967  | GGTAATTTTCGTCGTAGGGTAGGC          | GAACGCCAAACGCCGA                | 6FAM-ACCAAAAAACATCCCTAAAACGCCG-BHQ-1          |
| HB-147 | CTSD     | None | 1741982   | 1742072   | TACGTTTCGCGTAGGTTTGGA             | TCGTAAAACGACCCACCCTAA           | 6FAM-CCTATCCCGACCGCGCGGA-BHQ-1                |
| HB-148 | CTSD     | None | 1741878   | 1741942   | AAGTTGGGTCGGGTTGATTTT             | ATAATACGCCTACCCGCGC             | 6FAM-ACAATTCGCGCGCTCGCG-BHQ-1                 |
| HB-149 | PCR      | None | 100503526 | 100503701 | GGCGGTGACGCTCGTATTTC              | ACAAACCGTCCCGCGGA               | 6FAM-AACAACCGCTCGCGCCGA-BHQ-1                 |
| HB-150 | MLH1     | None | 37009766  | 37009849  | AGGAAGAGCGGATAGCGATTT             | TCTTCGTCCTCCCTAAAACG            | 6FAM-CCCGTACTTAAAAAATATACGCTTACGCG-BHQ-1      |
| HB-151 | FBXW7    | None | 153814403 | 153814526 | TGTCGTTGCGGGTTGGGAT               | CGAAAATAAATAACTACTCCGCGATAA     | 6FAM-ACGCCAAAACCTTCTACCTCGTCCGTA-BHQ-1        |
| HB-152 | EPM2AIP1 | None | 37009363  | 37009450  | CGTTATATATCGTTTCGTAGTATTTCGTGTTT  | CTATCGCCGCTCATCGT               | 6FAM-CGCGACGCTCAAACGCCACTACG-BHQ-1            |
| HB-153 | APC      | None | 112101379 | 112101452 | TTATATGTTCGGTTACGTGCGTTTATAT      | GACCAAAAACGCTCCCAT              | 6FAM-CCGTCGAAAACCCGCGGATTA-BHQ-1              |
| HB-157 | PTEN     | None | 89612994  | 89613081  | GTTTCGCGTTGTTGTAAGTTCG            | CAATATAACTACCTAAAACCTACTCGAACCG | 6FAM-TTCCCAACCGCAACCTACAACCTACTTA-BHQ-1       |
| HB-158 | CACNA1G  | None | 45993464  | 45993530  | TTTTTTCGTTTCGCGTTTAGGT            | CTCGAAACGACTTCGCGC              | 6FAM-AAATAACGCGGAATCCGACAACCGA-BHQ-1          |
| HB-160 | MGMT     | None | 131155503 | 131155585 | GCGTTTCGACGTTTCGTAGGT             | CACCTCTCCGAAAACGAAAACG          | 6FAM-CGCAAACGATACGCACCCGCGA-BHQ-1             |
| HB-163 | PENK     | None | 57521694  | 57521792  | GGTTAATTATAAAGTGGTTTTAGTAGTCGTTAA | CAACGTCTCTACGAAATCAACGAAC       | 6FAM-AACGCCTACCTCGCCGTCGCG-BHQ-1              |
| HB-164 | ESR1     | None | 152220942 | 152221042 | GGCGTTTCGTTTGGGATTG               | GCCGACACGCGAACTCTAA             | 6FAM-CGATAAAAACGAAACGCCGACGA-BHQ-1            |
| HB-165 | ESR2     | None | 63830670  | 63830741  | TTTGAAATTTGTAGGGCGAAGAGTAG        | ACCCGTCGCAACTCGAATAA            | 6FAM-CCGACCCAACGCTCGCGG-BHQ-1                 |
| HB-166 | CALCA    | None | 14950501  | 14950601  | GTTTGGAAAGTATGAGGGTGACG           | TTCCCGCCGCTATAAATCG             | 6FAM-ATTCGCAATACACAACAACCAATAAACG-BHQ-1       |
| HB-167 | TIMP3    | None | N/A       | N/A       | GCGTCGGAGGTTAAGGTTGTT             | CTTCCAAAATTACCGTACGCG           | 6FAM-AACTCGCTCGCCCGCGAA-BHQ-1                 |
| HB-168 | HIC1     | None | 1906660   | 1906760   | GTTAGGCGGTTAGGGCGTC               | CCGAACGCCTCCATCGTAT             | 6FAM-CAACATCGTCTACCAACACTCTCTACG-BHQ-1        |
| HB-169 | PCR      | None | 100505562 | 100505655 | TTATAATTCGAGGCGGTTAGTGTTT         | TCGAACTTCTACTAACTCCGCTACTACGA   | 6FAM-ATCATCTCCGAAAATCTCAAATCCCAATAATACG-BHQ-1 |
| HB-170 | CTNBN1   | None | 41215587  | 41215667  | GGAAAGGCGCGTCGAGT                 | TCCCTATCCCAAACCCG               | 6FAM-CGCGCGTTTCCCGAACCG-BHQ-1                 |
| HB-171 | CDH1     | None | 67328515  | 67328584  | AATTTTAGTTAGAGGGTTATCGCGT         | TCCCAAAAACGAACTAACGAC           | 6FAM-CGCCCACCGACCTCCGAT-BHQ-1                 |
| HB-172 | GSTP1    | None | 67107783  | 67107882  | GTCGCGCTCGTGATTTAGTATTG           | AAACTACGACGACGAAACTCCAA         | 6FAM-AAACCTCGCGACCTCCGAACCTTAAAAA-BHQ-1       |
| HB-173 | CDKN2B   | None | 21998980  | 21999060  | AGGAAGGAGAGAGTGCCTCG              | CGAATAATCCACCGTTAACCG           | 6FAM-TTAACGACACTTCTCCCTTCTTCCACG-BHQ-1        |
| HB-175 | KL       | None | 32488560  | 32488687  | AGTTTGGTTTTTCGCGTAGTATGTTT        | CGCCCGACTCCGCAC                 | 6FAM-CGAACGACGCGACGAAACGCT-BHQ-1              |
| HB-177 | TP73     | None | 3592223   | 3592304   | GGGTCGGGTAGTTTCGTTTTG             | CGAATTCGCTACGTCCCT              | 6FAM-AACCTCCGAACTCGCGAACGAA-BHQ-1             |
| HB-178 | DCC      | None | 48121053  | 48121210  | GGGTTTCGCGCGTGT                   | CGAAAAATACAAAAACCAACTTAAATACC   | 6FAM-ACCAAAAAATCGCGAACACGACAACACT-BHQ-1       |
| HB-179 | ATM      | None | 107599021 | 107599090 | ACGGAGAAAAGAAAGTCGTGGTC           | GCGACGATAACTACAAACGAAAT         | 6FAM-CGACTCTCTCGCTCTCTCCG-BHQ-1               |
| HB-180 | ATR      | None | 143780282 | 143780372 | AGCGGTTTTTCGGGAGGAGT              | GAATTCGCGACTCTCCAAA             | 6FAM-CGACGCCCGACGAAACCGTATAA-BHQ-1            |
| HB-181 | RUNX3    | None | 25001393  | 25001509  | CGTTTCGATGTTGGACGTGT              | GACGAACAACGCTTTATTACAACGC       | 6FAM-CGACGAACTCGCTACGTAATCCG-BHQ-1            |
| HB-182 | STK11    | None | 1157626   | 1157718   | TGAGGTTTCGGGTTTTATTGGAA           | GAATCCAAACCCGATACAAAATCT        | 6FAM-CGAAAATCCGAAACGACGACTCAAACG-BHQ-1        |
| HB-183 | STK11    | None | 1156690   | 1156793   | AATTAACGGGTGGGTACGTGCG            | GCCATCTTATTACCTCCCTCC           | 6FAM-CGACGCGCCGACCGCAA-BHQ-1                  |
| HB-185 | RBP1     | None | 140741145 | 140741234 | CGCGTTGGGAATTTAGTTGTC             | GATACTACGCGAATAATAACGACCC       | 6FAM-ACGCCCTCCGAAAACAAAAACTCTACG-BHQ-1        |
| HB-186 | ARPC1B   | None | 98616846  | 98616917  | TGCCGCGGTATCCGTTAGTAT             | ACCTAAACCAACGATCCGGAAAT         | 6FAM-CAAATCCCGCCCTCCCTCGAAAT-BHQ-1            |
| HB-187 | MINT2    | None | 58567574  | 58567662  | TTGAGTGGCGGTTTTCTGT               | TCCCGCCTAAACCAACC               | 6FAM-CTTACGCCACCGCTCCGA-BHQ-1                 |
| HB-190 | CHFR     | None | 132074209 | 132074312 | CGGGAGTTTTTATGGGCGT               | AACCGTCCCAAAACTACGAC            | 6FAM-CCTCGAACCGCTCCATCGAAATTA-BHQ-1           |

|        |             |      |           |           |                                |                               |                                            |
|--------|-------------|------|-----------|-----------|--------------------------------|-------------------------------|--------------------------------------------|
| HB-191 | VHL         | None | 10158449  | 10158542  | CGGGAGCGCTACGTAGTT             | CTCCGAAACATTCCTCCG            | 6FAM-CGAACCGAACCCGCGAAA-BHQ-1              |
| HB-192 | TGFBR1      | None | 98946812  | 98946910  | ACGCGCGTTTATTGGTTGTC           | ACGAACCCGCAAAACGAAA           | 6FAM-TAAATCCCCTTAAACAACCTCGGACGA-BHQ-1     |
| HB-194 | SCGB3A1     | None | 179950956 | 179951042 | GGCGTAGCGGGCGTC                | CTACGTAACCCATCTACAACTCCG      | 6FAM-CGAACCTCCTAACCGCGACGATACAAAACCTAA-BHQ |
| HB-195 | CDX1        | None | 149526555 | 149526622 | TGAGCGGTTGTTCTGTCGTC           | AAATCCCGCGCATACTA             | 6FAM-CCTAAAACCGCGCTACCGACCG-BHQ-1          |
| HB-196 | ARF/CDKN2A  | None | 21984540  | 21984608  | ACGGGCGTTTTCGGTAGTT            | CCGAACCTCCAAAATCTCGA          | 6FAM-CGACTCTAAACCTACGCACGCGAAA-BHQ-1       |
| HB-197 | CRABP1      | None | 76419794  | 76419875  | TCGAAAATTTTCGTTGTTGCGT         | TATCCGTACCTACCGCCGC           | 6FAM-ACCATAACCAACTTCGCGACACCTAA-BHQ        |
| HB-198 | FAM127A***  | None | 133891933 | 133892014 | GATGGACGGTCGGGTGAGTT           | AATCGAATTCCTCCAACGACG         | 6FAM-TCGCAAAACCGAATCGACAAAACCAA-BHQ        |
| HB-203 | JUP         | None | 37196423  | 37196513  | GGATAGCGAATTGAGTTCGGC          | CTCTTCGCTTTTATTGCTACTAAAT     | 6FAM-AAACAACCGCGCCGACCA-BHQ-1              |
| HB-204 | MT1G        | None | 55259560  | 55259636  | CGTTTAAAGGATTTTGATTTGGTTTAT    | CCGCTAAATCCGCAACCG            | 6FAM-CGCGATCCCGACTAAACTATACGA-BHQ-1        |
| HB-209 | OPCML/HNT   | None | 132319029 | 132319100 | CGTTTCGAGGCGGTATCG             | CGAACCGCGAAAATATCAT           | 6FAM-AACAACTCCATCCCTAACCGCCACTTTCT-BHQ-1   |
| HB-211 | PAX8        | None | 113752214 | 113752309 | GTTTCGTAGTTTCGTCGAGGGTTC       | CGCATCTCATACCTTCTCTAAAT       | 6FAM-CAAACGCGACCCGAACTACGAAAA-BHQ-1        |
| HB-213 | TTF1        | None | 36058456  | 36058584  | CGAAATAAACCGAATCCTCTTAA        | TGTTTTGTTGTTTTAGCGTTTACGT     | 6FAM-CTCGGTTTATTTTAAACCGACGCCA-BHQ-1       |
| HB-214 | PRKAR1A     | None | 64019490  | 64019573  | CGGATTTGTAAGTAGTTGCGTTGC       | ACCGAACACAAAATACGCGAC         | 6FAM-CATCCCGACCATCCGCGCG-BHQ-1             |
| HB-216 | THR3        | None | 24511656  | 24511731  | TCGTGCTGTTATCGTCCG             | CGGCTGAGAACCCGATAACTAAT       | 6FAM-CCCTCAAACCTCACGACTATCCGACTTA-BHQ-1    |
| HB-217 | WDR79       | None | 7532404   | 7532486   | TTTGTGTCGCGGGATTTC             | CGAATTCGTAATCGCCC             | 6FAM-TAATCCGAAATACGACGCCAATCGAAAA-3'BHQ    |
| HB-218 | DLC1        | None | 13034914  | 13034989  | AGTAAAGGATGCGTTGAGGATCG        | ACGACTCGACTTCCGCGTC           | 6FAM-AAACCCACGACGACCCGAAACG-BHQ-1          |
| HB-221 | GDNF        | None | 37875633  | 37875741  | CGGTAGTTGTCGTTGAGTCGTTTC       | AACAACCGCGCTACTTTAAATA        | 6FAM-CGCGCGTCGCGCTCTTAACTAAAA-BHQ-1        |
| HB-222 | GDNF        | None | 37870607  | 37870697  | TCGTTTGTTCGCGTAGGTGTC          | CGATATAAAACAACCAAAACAACAAC    | 6FAM-TCCATAAECTCATCTTAAATCCCGTCCG-BHQ-1    |
| HB-224 | LRRC41      | None | 46480839  | 46480910  | TTCGGTTTCGGGTTTTAACG           | CCCATATAAACGCTCACCGC          | 6FAM-CCCGCACAACCTCGAACAAAACGAAA-BHQ-1      |
| HB-225 | DLEC1       | None | 38055976  | 38056105  | TCGTTGCGTATTTAAGATATTCGTATT    | CGTAACGCTCATTCGCTACC          | 6FAM-TAATAAECTTACGCTCACTTCGTCGCCG-BHQ-1    |
| HB-226 | CDK2AP1     | None | 122281168 | 122281288 | CGCGGAAAGTTTGGCGT              | CGCACTTTTTATTATCGACGACTC      | 6FAM-CGACAAAATAACCGTCCGCGCCCTA-BHQ-1       |
| HB-227 | AXIN1       | None | 342213    | 342213    | CGGTTTTGTTGTTGTTTCGTTGTT       | CGGCTGAGAACCCGCTTAAA          | 6FAM-ATCCGAAACCTCGAACGCGTCTCG-BHQ-1        |
| HB-228 | PYCARD      | None | 31121237  | 31121332  | TTGGAGATTTACGGCGTTCG           | ACCCTAATACGTAACCGCTACAA       | 6FAM-CATCTCTACAACCCATATCGCGCAA-BHQ-1       |
| HB-229 | EBF3        | None | 131652354 | 131652431 | GTAGGATATTCGCGGATCGTTC         | GCAACACTCACTACCCGTTTAT        | 6FAM-TCTTTAAACAACGAAACCGCGCAA-BHQ-1        |
| HB-230 | CDKN1A      | None | 36754719  | 36754810  | CGCGTTTCGGTTTGGCGTAT           | TTATAATCCCGCTCTCCGCC          | 6FAM-AAATCTCCGACACATCCCGACTCTCGT-BHQ-1     |
| HB-231 | PSAT1       | None | 78141710  | 78141790  | TGGTTTTGTTGTTTCGTTAAGTTGT      | ACGTACTCCCGCTTAAACCTC         | 6FAM-ACGCGCGTCCGCAAACTTAAATAA-BHQ-1        |
| HB-232 | ERBB2       | None | 35110117  | 35110193  | AGTAGCGCGGGATTTTGT             | ACTCGTCCGAACCCCTCTAAC         | 6FAM-CGCGGACCCGAAACCTCG-BHQ-1              |
| HB-236 | PITX2       | None | 111901970 | 111902049 | GTTGTTTCGTTAATAAGGACGTTTC      | CCGACCCCGCACTACTAATAAAT       | 6FAM-ACAAAACAATCCCTCCACCGCGACT-BHQ-1       |
| HB-238 | CYP1B1      | None | 38213993  | 38214078  | GGGTTAGCGGTTGTTGAGGTAAC        | CCCGGTTTCGATCAATAA            | 6FAM-AAAACGCGAACCGAAACTACCGCT-BHQ-1        |
| HB-243 | ONECUT2**** | None | 53256301  | 53256419  | CGTTACGTATATCGCGCGG            | CAAAAACCTCTCTXXXATAAACGACGAAT | 6FAM-AACACGCAATTACGCGCTTTTATACGA-BHQ-1     |
| HB-245 | RB1         | None | 47775771  | 47775890  | TTAGTTCCGCTATCGATTAGCG         | ACTAAACGCGCGTCCAA             | 6FAM-TCAGTCCGCAAACTCCCGA-BHQ-1             |
| HB-246 | TGFBR2      | None | 30623298  | 30623377  | GCGCGGAGCGTAGTTAGG             | CAAACCCCGCTACTCGTCAT          | 6FAM-CACGAACGACGCTTCCCGAA-BHQ-1            |
| HB-249 | AR          | None | 66546885  | 66546963  | GCGTTTTTTTCGAGATTTCGG          | GCCTCTCTACTATAAACTTACTCCG     | 6FAM-ACCGTCCCGCTCTCCCAACAACTA-BHQ-1        |
| HB-250 | GRIN2B      | None | 14025182  | 14025264  | GTCGGATTTACGCGTCGAGT           | CTACCGCGCGCTAAAATAC           | 6FAM-ACGCACGAAACTCACCTACAACGATTCG-BHQ-1    |
| HB-252 | DRD1        | None | 174804232 | 174804303 | GGCGCGGTTGGTTC                 | TACCCGTAACGCCTATACTACC        | 6FAM-CTCGCAAAAAACGCGACGCAACTA-BHQ-1        |
| HB-255 | GAD1        | None | 171497859 | 171497935 | ATTTTTATTAGAGGGCGTTAAGAGTTTAGA | CGCTCGAACGCTAACGAAA           | 6FAM-CCCGAAAAACGCAAACTCTCCGT-BHQ-1         |
| HB-260 | NEUROD2     | None | 35017643  | 35017731  | GGTTTGGTATAGAGGTTGGTATTTTCGT   | ACGAACCGCGACGCTCTC            | 6FAM-CGCCATACGAACCGGAAACGAAATAA-BHQ-1      |
| HB-261 | NEUROG1     | None | 134899670 | 134899757 | CGTGTAGCGTTTCGGGTTTGTGA        | CGATAATTACGAACCACTCCGAAT      | 6FAM-CGATAACGACCTCCCGGCAACATAAA-BHQ-1      |
| HB-264 | PSEN2       | None | 223365485 | 223365573 | GAGGCGTGTAGTAGCGGG             | CCGATACTAAAACCGAATAAACTCG     | 6FAM-CGCAACGAAAATCTCCGACGAAAAA-BHQ-1       |
| HB-265 | PSEN2       | None | 223365233 | 223365337 | TTTTGCGTGCATAGCGTTT            | CTTCCACGACCAATTCGG            | 6FAM-CGCGCGCTACCGAACACTCTCTCT-BHQ-1        |
| HB-266 | APP         | None | 26465290  | 26465385  | AACGAAATGCGGATAAAAACGTAT       | TCGTCCCGTAAACTTAAATCATC       | 6FAM-CCCGCAAACCTCCGCAAAATATCGTATAA-BHQ-1   |
| HB-267 | HOXA1       | None | 26909068  | 26909138  | GTTGTTGCGCGATTGTAATA           | CGCGCAAAACGCAACT              | 6FAM-TACTCTTCTCGCTCCAACACTCCAAATCG-BHQ-1   |
| HB-271 | HOXA10      | None | 26992754  | 26992829  | ATCGGAAGTGCGTTATTTCTGTG        | TTCCGTCTCTCGACTCGAAACT        | 6FAM-CTCCGACCAACTTAAACGCGCA-BHQ-1          |
| HB-272 | HOXA11      | None | 26998639  | 26998738  | TTTTGTTTTCGATTTTATGTCGGAAT     | TAATCAAATCACCGTACAAAATCGAAC   | 6FAM-ACCACCAAAACAACATCCACGACTTCA-BHQ-1     |
| HB-274 | TMEFF2      | None | 192885270 | 192885342 | CGACGAGGAGGTGTAAGGATG          | CAACGCTAACGCAACGAAAC          | 6FAM-TATAACTTCCGCGACCCGCTCTCT-BHQ-1        |
| HB-275 | SMAD2       | None | 43711755  | 43711832  | CGAGGCGGTAGGTTTTTATAGGT        | CGCATTAAAACGATTCCCGAT         | 6FAM-CCGATCCCTCGCAACGCTGTAA-BHQ-1          |
| HB-276 | SMAD2       | None | 43710779  | 43710916  | GTCGTCCGGTCGGGTTTCG            | CCTTTTATCTCTCTCTTCCGAT        | 6FAM-AAAAACACTCCCGACCCGCTCT-BHQ-1          |
| HB-277 | SMAD4       | None | 46810459  | 46810528  | GTTTTCGCTAGAGCGATTTTTTTC       | CGAACTTTCCTTCTCCGACT          | 6FAM-CCCGCTCCCGCTCCGAATA-BHQ-1             |
| HB-280 | SFRP2       | None | 155067644 | 155067735 | CGGTTTTATGTCGTCGGTTGTTAGT      | AACACCCGTAACCTTAACTATC        | 6FAM-CGAACCCGCTCTTCCGCTAAATACGA-BHQ-1      |
| HB-281 | SFRP4       | None | 37729547  | 37729625  | GTTGTTCCGGCGGGTTC              | GCGAAACTCCGCGCTCTA            | 6FAM-AAACACGAAACGCAACTCTCAACT-BHQ-1        |
| HB-282 | SFRP5       | None | 99521371  | 99521463  | GCGTTTGTAGTTTATCGTGTGGTAGA     | GAACCGCTACACGACCGCT           | 6FAM-CGCGCAATACCTTAACTCCCTACCG-BHQ-1       |
| HB-303 | CLDN7       | None | 7105597   | 7105689   | CGGTTAAAGTATCGTTGTTTCGAG       | GACTACACGTAACCGCGACC          | 6FAM-CGATCGCCACGTTCTCTCTCT-BHQ-1           |

|        |               |      |           |           |                                  |                                   |                                               |
|--------|---------------|------|-----------|-----------|----------------------------------|-----------------------------------|-----------------------------------------------|
| HB-304 | FAF1          | None | 51138014  | 51138088  | CGTTTTGCGGTTTTACGTGA             | CAACGCAAAAATCCTAACCGAA            | 6FAM-CGCGCGCTCAACGCTTAAACAAAAAATA-BHQ-1       |
| HB-305 | FAF1          | None | 51137773  | 51137850  | GGATGTGGGTTCCGGTTTTATAGTC        | CCGCTAAAAATATCCGAATACGC           | 6FAM-ATCGCAACCTACCCTCATCTAACCCG-BHQ-1         |
| HB-307 | TNFRSF10B     | None | 22982682  | 22982764  | TTTTGGCGGTTGCGTTTC               | CTCATTTCCCCCAAATTTCCGAT           | 6FAM-ATCCTAACGCGAAACAAAACCCAAAAACAA-BHQ-1     |
| HB-308 | TNFRSF10C     | None | 23016667  | 23016789  | GGGAAGAGCGTATTTGGCG              | TCCCTAACTCCGACGACG                | 6FAM-CGAACATACCCGACCGCAAATACCA-BHQ-1          |
| HB-309 | TNFRSF10D     | None | 230770092 | 23077216  | GGGAAGAGCGTATTTGGCG              | TCCCTAACTCCGACGACG                | 6FAM-TACCCGACCGCAAACGACCCG-BHQ-1              |
| HB-314 | TFAP2A        | None | 10523187  | 10523295  | CGTTAATTTTTAAAGTATTTTTATGGATCG   | CCGACAACCAACACTTTACGC             | 6FAM-CGAAACCGAAAAAACATATCCGTTACG-BHQ-1        |
| HB-315 | SMAD9         | None | 36392381  | 36392455  | CGCGAAGTTTTATCGTTCTGATTAG        | CGAAAACGAAACCGCAAAACA             | 6FAM-AACTCCCTAACCGCTTTCCAAATCGACG-BHQ-1       |
| HB-316 | EYA4          | None | 133604237 | 133604343 | GGAAAGAGTTGCGGGAAAAAGT           | ACCAAAACTCCGAACTACGACAAA          | 6FAM-AACGCGCCCAACCGCG-BHQ-1                   |
| HB-317 | EYA4          | None | 133604142 | 133604208 | TGGATAGGATGGAAGTTTTGCG           | AACTACCGACAACGCGACG               | 6FAM-CGCTCCGACCGTCCCGACTT-BHQ-1               |
| HB-318 | IGF2          | None | 2117157   | 2117238   | GGTTGGCGCGATTATAAGAGTC           | AACCGACCGAACCTCACG                | 6FAM-AACTCCGCGAAAAACAAACGAACTACG-BHQ-1        |
| HB-319 | IGF2          | None | 2116714   | 2116801   | GAGCGGTTTCGGTGTCTGTTA            | CCAACCTCGATTAAACCGACG             | 6FAM-CCCTCTACCGTCGCGAACCGA-BHQ-1              |
| HB-320 | NKD2          | None | 1062127   | 1062205   | CGGTTTATCGTGTTCGATTGTAGT         | CAACCCTACACTAAACGCGA              | 6FAM-CCCGACGAAACGTAACGACGACGATAA-BHQ-1        |
| HB-321 | ITGA4         | None | 182147511 | 182147581 | TGCGGAGGCGTAGGGTC                | CAACCGAAATCCCCCAACG               | 6FAM-CCTACAACCGCGCTTAAACAAAAACG-BHQ-1         |
| HB-322 | RARRES1       | None | 159932677 | 159932741 | GGCGAGTCCGATCCGAA                | CGCAAATCCTTACAACAACGAA            | 6FAM-CGCGCGGACGCTTCACTTCTTCAA-BHQ-1           |
| HB-323 | GATA4         | None | 11599555  | 11599628  | GATGGTGGTCCGCGTGAAGTTA           | TTCCCTCATATACGAACTACCG            | 6FAM-CCTATCCCGAATCCGTCAATCCCG-BHQ-1           |
| HB-324 | GATA4         | None | 11602786  | 11602873  | GGCGAGGAGGAAGGAGTTAGTT           | GAATCCCCACTCGTACAC                | 6FAM-CCGCGACCAACACGCAAAACTACT-BHQ-1           |
| HB-326 | GATA5         | None | 60484577  | 60484661  | AGTTACGTGATTTTGGTAGGTTTTGTT      | TAATCCGAACTCCGCGCTA               | 6FAM-CCCCTATCGTACGCTTATCGCCAAA-BHQ-1          |
| HB-328 | CDKN1C        | None | 2863369   | 2863454   | TTATCGGATAGTTAGGTAGTCGTCGC       | AAAACGAAAAACCGAACGCAA             | 6FAM-CGCGCCGCCGACTCTACGTAT-BHQ-1              |
| HB-329 | CDKN1C        | None | 2862551   | 2862625   | TCGAGTAGGGCCGGAATTAG             | GTCCCGAAATCCCGAAT                 | 6FAM-AACTAATCAACGAAAACTCCTAACCGCGCT-BHQ-1     |
| HB-334 | MUTYH/TOE1    | None | 45475024  | 45475101  | GTTTTGAAGGTTATTTTTGGGAAGTC       | GCCGACAATAACGATAACGCA             | 6FAM-TCAACTCCCGCACTTCCGACGATA-BHQ-1           |
| HB-335 | TUSC3         | None | 15442252  | 15442317  | CGCGTAGGGA GTTGGGC               | CCCCATCGCGACAAAAT                 | 6FAM-TCTCTCCACGCGCGATAACCGT-BHQ-1             |
| HB-336 | SOCS4/WDHD1   | None | 54563562  | 54563642  | TATATTGCGTTTTCGCTCGATTTC         | ACGCCGCAACTAACGCC                 | 6FAM-CCCGACGACTCTATCGAAACCTACGCTA-BHQ-1       |
| HB-337 | SOX4          | None | 21702727  | 21702814  | GTTCTGCGTAGTCCGAGGTTATGG         | CGCCCGAATCCGAACTCT                | 6FAM-CCAAACAACGCTTCCGATTTCTCCGACTT-BHQ-1      |
| HB-340 | PTEN          | None | 89613229  | 89613308  | TCGGTTTTTCGAGGCGTTTC             | CGCGTATCTACCGCAACG                | 6FAM-CACATCACCGCCCGCGACCTA-BHQ-1              |
| HB-341 | PTEN          | None | 89613229  | 89613308  | TTTCGGAGGTCGTCGGC                | CTACGACGACTACTAAATAATTACAACGACT   | 6FAM-AACAACCAAAAAACCTAACACGACGACAACG-BHQ-1    |
| HB-342 | PTEN          | None | 89613229  | 89614064  | TTTCGGAGGTCGTCGGC                | GCAACCGAATAATAACTACTACGACG        | 6FAM-AACAACCAAAAAACCTAACACGACGACAACG-BHQ-1    |
| HB-343 | PTEN          | None | 89613911  | 89614051  | TTTCGGAGGTCGTCGGC                | AACTACTACGACGACTACTAAATAATTACAACG | 6FAM-AACAACCAAAAAACCTAACACGACGACAACG-BHQ-1    |
| HB-350 | PTPN6         | None | 6926164   | 6926293   | GTAAGTTTCGGGTATTATCGGGGTT        | AACCGAAAAACAACGCAAAACA            | 6FAM-AAATCGCACTACGTTACACACGTCGAA-BHQ-1        |
| HB-361 | TFPI2         | None | 93164648  | 93164723  | TTGGAGTAGAAAGTCGCGTATTTTT        | AAAAATCGAACCCCGCTA                | 6FAM-ACAAAACGTCGGAAAAACCGCTAACGAA-BHQ-1       |
| HB-362 | CXCR4         | None | 136709382 | 136709472 | TCGGTCAACGGTTAGAAATTT            | AATACGATAAECTACTAAACACTCAAACCCCT  | 6FAM-ACGTCACTTTACTACTACTACCGCAACCAACAA-BHO-1  |
| HB-363 | BNIP3         | None | 133645457 | 133645525 | TGCGTACGCGTAGGTTTTAAGTC          | CAAAAACGAAACCGAACGAATCT           | 6FAM-CGACCCGCTCGCCCTTAACCC-BHQ-1              |
| HB-364 | MINT32/ZFP64  | None | 50155080  | 50155158  | GGTTTTTTCGTTATTTTCGCGG           | CCCAACACCTCACTCCGA                | 6FAM-CGCGACTACGCGCCGAAAAATA-BHQ-1             |
| HB-386 | OAZ1          | None | 2220665   | 2220783   | AATTTAGCGTTATTTTACGTTAGTCGATT    | CGACGCTTCTAAAAACTTCGAAC           | 6FAM-CGCGCGACTATACAACTTAAAAACGACA-BHQ-1       |
| HB-387 | SAT1          | None | 23560691  | 23560805  | CGTGTGAATTCGGAGGATAAAAAGT        | CACCGACTCCCAATAAAAATTTCC          | 6FAM-CGCGAAACGCCACTAAAAAACGCC-BHQ-1           |
| HB-388 | ODC1          | None | 10539638  | 10539727  | TTAGGGAGTAGAGGCGCGG              | CGCGAAAAACGTAAAAAACGACT           | 6FAM-CCAACCCCTACCCGCAACGTAACGA-BHQ-1          |
| HB-389 | SHARBEY locus | None | 4445358   | 4445473   | CGTTTTTTTCGTTAATTATCGGAG         | TAAAACCGAAACCCCGGAT               | 6FAM-ACGACTAACTCCGAACCCGCGACCG-BHQ-1          |
| HB-390 | LHFPL4        | None | 9569077   | 9569177   | TATTATTGCGTGGGTAGCGG             | ACGACCGCCTTAAAAACGCT              | 6FAM-CCGACAAATAAECTCGCGACCCGCC-BHQ-1          |
| HB-392 | PTPRN2        | None | 156981836 | 156981929 | CGTTTTAATAGTTTCGGGTTTATGTTATAAGT | AACTACGCTTTCTCAACGCCTC            | 6FAM-TAAAAACGACCCGCTACTCGCAAAAAA-BHQ-1        |
| HB-394 | 2C35          | None | 23502454  | 23502526  | TCGTTATTTAGGCGGTCGTTGT           | ATCAACCCCTTCTTACGCTTC             | 6FAM-CAAAAACCCGCGACGCAACGAAA-BHQ-1            |
| HB-396 | PCTK2         | None | 95296605  | 95296679  | TAGTCGTGAGTGTGAAAGCGA            | CCGGAAAAACTCAAAAAACTAC            | 6FAM-ACGACCCGCTTCGCTTCTTACG-BHQ-1             |
| HB-397 | RNF135        | None | 26322491  | 26322594  | ATATAGGCGGGTTTCGATTTTGT          | CCTACCCGCTACAATTCGGA              | 6FAM-CGAAACCTTCGCGACCCGCGTA-BHQ-1             |
| HB-398 | GP1BB         | None | 18085438  | 18085506  | TGGGAGCGGAAAGTTTGTAGC            | AACGCGGCTACAACGAC                 | 6FAM-AATAACACACTATCGCGAAAAACCGCAAA-BHQ-1      |
| HB-401 | GATH          | None | 43458059  | 43458132  | TTTTTGTAGTCCGCTTTCGTTTC          | GCCGACCCACCACTAT                  | 6FAM-CGACAACCAATAAACCCGCAAAAAACGA-BHQ-1       |
| HB-402 | ECH1          | None | 44014197  | 44014286  | TTACGTCGGGTTAGTAGGTCGC           | CTCCGTCGGAACGCAATAAA              | 6FAM-CGACGATAACGACGAAAAATAAATACTTCTCGCA-BHQ-1 |
| HB-405 | COMP          | None | 18762980  | 18763072  | CGGGTGTAAACGCGGTTT               | CCCGACACCGCTACGT                  | 6FAM-CTTCTACTCACCTTAACCTCCGACGCG-BHQ-1        |
| HB-406 | COMP          | None | 18760492  | 18760565  | CGTCGTTGGTAGTCGGACGT             | ACGCAAAACTCTTCCAATACG             | 6FAM-CCCGTACCAACCCGACTTCGTAACG-BHQ-1          |
| HB-407 | EIF3S6IP      | None | 36569780  | 36569878  | TGAGTTACGGAACCGGGTTT             | CCCCTCGAACCTACCGAAA               | 6FAM-CGAAAACCTTTCCGAAACCTTAACATCTAAA-BHQ-1    |
| HB-408 | FKBP2         | None | 63765045  | 63765119  | GTTACGGGGCGTGTGGTC               | TCGTGCTACCAACCGAAC                | 6FAM-CGCGCCCTCCCTTATTAACCGT-BHQ-1             |
| HB-409 | OPCML         | None | 132318804 | 132318904 | GTTCTGTTAGTTTTTCGTGCGTTC         | TCCGATCGATAACCGTCTCTA             | 6FAM-CGATCGACGACTCGCGACCAACC-BHQ-1            |

|          |        |        |      |           |           |                         |                           |                                          |
|----------|--------|--------|------|-----------|-----------|-------------------------|---------------------------|------------------------------------------|
|          | HB-410 | HNT    | None | 131285898 | 131285982 | TTCGTCGAGTTTCGTCGGATA   | GAAATCCTACGACAACCGCCT     | 6FAM-CAACTTCCTCGAAACCCAAATACGCGCT-BHQ-1  |
| <b>C</b> | HB-043 | DIRAS3 |      | 68228349  | 68228434  | GCGTAAGCGGAATTTATGTTTGT | CCGCGATTTTATATCCGACTT     | 6FAM-CGCACAAAAACGAAATACGAAAAACGCAA-BHQ-1 |
|          | HB-493 | MEST   |      | 6058      | 6144      | CGGCGTTCGGTGTITTTGTAA   | CACACTCACCTACGAAAACGATCTC | 6FAM-ACGCACCATAACCGCGTTATCCCATACC-BHQ-1  |

\* Unidentified Interspersed Repeat (UIR) within Caspase 8 (apoptosis-related cysteine protease) sequence.

\*\* This is the seq derived from clone AF135501. The bigger genomic clone we used for CpG island location has mismatched with the FW pr

\*\*\* The FAM127A gene with its promoter is highly similar(90%) with 2 other uncharacterized adjacent genes and their promoters, DKFZ56B417 (to the right) and BC048268 (to the left), both on the opposite strand. The promoters are CpG islands for all these 3 genes. There are few mismatches in the primer/probe seq of the FAM127A amplicon relative to the other genes so that is very likely that all these 3 genes are targeted for amplification.

\*\*\*\* Antisense primer is missing 3 nucleotides (XXX). These should be GTG.

<sup>φ</sup> C(t) of 'None' indicates that no methylation was detected by this reaction.
