# Supplementary material for: Widespread Epigenetic Abnormalities Suggest a Broad DNA Methylation Erasure Defect in Abnormal Human Sperm
Source: PubMed Central journal article supplement (PMC2100168; doi:10.1371/journal.pone.0001289), 2007-12-12
Supplement: pone.0001289.s002.pdf [file pone.0001289.s002.pdf]

|           |      |      |      |      |      |      |      |      |      |      |
|-----------|------|------|------|------|------|------|------|------|------|------|
| LOX       | 1309 | 0.02 | 0.03 | 0.02 | 0.02 | 0.03 | 0.03 | 0.02 | 0.05 | 0.05 |
| POGFA     | 5930 | 0.02 | 0.04 | 0.02 | 0.02 | 0.03 | 0.03 | 0.02 | 0.04 | 0.04 |
| BCDO      | 1558 | 0.03 | 0.03 | 0.02 | 0.02 | 0.03 | 0.03 | 0.02 | 0.03 | 0.05 |
| LF        | 742  | 0.03 | 0.03 | 0.02 | 0.02 | 0.03 | 0.03 | 0.02 | 0.03 | 0.03 |
| IRK1      | 44   | 0.11 | 0.02 | 0.08 | 0.02 | 0.03 | 0.02 | 0.03 | 0.04 | 0.04 |
| TFP2      | 2097 | 0.03 | 0.03 | 0.02 | 0.02 | 0.03 | 0.03 | 0.02 | 0.05 | 0.05 |
| SKI       | 1604 | 0.03 | 0.03 | 0.03 | 0.03 | 0.02 | 0.03 | 0.02 | 0.03 | 0.03 |
| ARNT      | 3022 | 0.04 | 0.03 | 0.03 | 0.02 | 0.03 | 0.03 | 0.02 | 0.03 | 0.03 |
| COL4A3    | 125  | 0.02 | 0.03 | 0.02 | 0.02 | 0.03 | 0.03 | 0.02 | 0.05 | 0.05 |
| FANCF     | 794  | 0.02 | 0.03 | 0.02 | 0.02 | 0.03 | 0.03 | 0.02 | 0.05 | 0.05 |
| ICAM1     | 2651 | 0.03 | 0.03 | 0.02 | 0.02 | 0.03 | 0.03 | 0.02 | 0.04 | 0.03 |
| DUSP4     | 1808 | 0.04 | 0.03 | 0.02 | 0.02 | 0.03 | 0.03 | 0.02 | 0.02 | 0.03 |
| YES1      | 5462 | 0.03 | 0.03 | 0.02 | 0.02 | 0.03 | 0.03 | 0.02 | 0.02 | 0.03 |
| CFP1      | 597  | 0.04 | 0.03 | 0.02 | 0.02 | 0.03 | 0.03 | 0.02 | 0.05 | 0.05 |
| PCDH1     | 2656 | 0.02 | 0.04 | 0.03 | 0.03 | 0.03 | 0.03 | 0.02 | 0.04 | 0.04 |
| DAPK1     | 2421 | 0.03 | 0.03 | 0.02 | 0.02 | 0.03 | 0.03 | 0.03 | 0.05 | 0.08 |
| ZFP3      | 4918 | 0.03 | 0.03 | 0.03 | 0.03 | 0.03 | 0.03 | 0.03 | 0.04 | 0.03 |
| EGFR      | 720  | 0.02 | 0.03 | 0.03 | 0.03 | 0.03 | 0.03 | 0.03 | 0.03 | 0.03 |
| HSP90     | 2707 | 0.02 | 0.03 | 0.03 | 0.03 | 0.03 | 0.03 | 0.02 | 0.05 | 0.06 |
| RET       | 2961 | 0.03 | 0.03 | 0.02 | 0.02 | 0.03 | 0.03 | 0.02 | 0.08 | 0.06 |
| RASA1     | 1697 | 0.05 | 0.02 | 0.04 | 0.03 | 0.02 | 0.03 | 0.03 | 0.1  | 0.04 |
| CREB1     | 4297 | 0.02 | 0.03 | 0.02 | 0.02 | 0.03 | 0.03 | 0.02 | 0.1  | 0.04 |
| RAB37     | 3897 | 0.02 | 0.03 | 0.02 | 0.02 | 0.04 | 0.03 | 0.03 | 0.04 | 0.07 |
| HDXA1     | 3488 | 0.03 | 0.03 | 0.03 | 0.03 | 0.02 | 0.03 | 0.03 | 0.05 | 0.09 |
| HGFBR1    | 1111 | 0.03 | 0.03 | 0.02 | 0.02 | 0.03 | 0.03 | 0.02 | 0.03 | 0.03 |
| RARB      | 4165 | 0.03 | 0.03 | 0.02 | 0.02 | 0.03 | 0.03 | 0.03 | 0.03 | 0.05 |
| FHT       | 1887 | 0.03 | 0.02 | 0.02 | 0.02 | 0.03 | 0.03 | 0.03 | 0.03 | 0.06 |
| LMO1      | 4247 | 0.03 | 0.03 | 0.03 | 0.03 | 0.03 | 0.03 | 0.03 | 0.03 | 0.03 |
| DNFBP1    | 3996 | 0.03 | 0.03 | 0.03 | 0.03 | 0.03 | 0.03 | 0.03 | 0.03 | 0.05 |
| APRA1     | 16   | 0.03 | 0.03 | 0.03 | 0.03 | 0.03 | 0.03 | 0.03 | 0.03 | 0.03 |
| TMEM71    | 3879 | 0.03 | 0.03 | 0.03 | 0.03 | 0.03 | 0.03 | 0.03 | 0.03 | 0.03 |
| NOTCH2    | 4206 | 0.03 | 0.04 | 0.03 | 0.03 | 0.02 | 0.03 | 0.07 | 0.03 | 0.02 |
| CASP6     | 4209 | 0.02 | 0.03 | 0.02 | 0.02 | 0.03 | 0.03 | 0.05 | 0.03 | 0.06 |
| HSP90     | 5925 | 0.02 | 0.03 | 0.02 | 0.02 | 0.03 | 0.03 | 0.03 | 0.05 | 0.05 |
| TNFRSF10C | 3981 | 0.03 | 0.02 | 0.02 | 0.02 | 0.05 | 0.02 | 0.05 | 0.03 | 0.05 |
| PGF       | 1024 | 0.05 | 0.03 | 0.03 | 0.03 | 0.03 | 0.03 | 0.03 | 0.06 | 0.07 |
| TFG2      | 5074 | 0.03 | 0.03 | 0.03 | 0.03 | 0.03 | 0.03 | 0.03 | 0.04 | 0.04 |
| MMP2      | 4307 | 0.02 | 0.05 | 0.02 | 0.02 | 0.03 | 0.02 | 0.04 | 0.03 | 0.09 |
| TNFRSF10A | 3982 | 0.03 | 0.03 | 0.03 | 0.03 | 0.03 | 0.03 | 0.03 | 0.03 | 0.03 |
| TUBB1     | 1162 | 0.05 | 0.03 | 0.03 | 0.03 | 0.03 | 0.03 | 0.03 | 0.03 | 0.03 |
| ONMT      | 3338 | 0.03 | 0.03 | 0.03 | 0.03 | 0.04 | 0.03 | 0.03 | 0.12 | 0.12 |
| MLL74     | 4134 | 0.03 | 0.03 | 0.03 | 0.03 | 0.03 | 0.03 | 0.04 | 0.11 | 0.11 |
| ADAMT12   | 40   | 0.03 | 0.03 | 0.03 | 0.03 | 0.02 | 0.03 | 0.02 | 0.03 | 0.05 |
| LRRCC2    | 3717 | 0.03 | 0.03 | 0.03 | 0.03 | 0.03 | 0.03 | 0.03 | 0.03 | 0.03 |
| VIM       | 5981 | 0.02 | 0.04 | 0.03 | 0.03 | 0.04 | 0.02 | 0.03 | 0.03 | 0.03 |
| ACVRI1    | 5834 | 0.03 | 0.02 | 0.02 | 0.02 | 0.03 | 0.02 | 0.04 | 0.03 | 0.06 |
| FRFR2     | 2485 | 0.03 | 0.03 | 0.03 | 0.03 | 0.03 | 0.03 | 0.03 | 0.04 | 0.05 |
| FZD7      | 1600 | 0.04 | 0.03 | 0.03 | 0.03 | 0.03 | 0.03 | 0.03 | 0.04 | 0.04 |
| PLT1      | 3709 | 0.03 | 0.03 | 0.03 | 0.03 | 0.03 | 0.03 | 0.03 | 0.03 | 0.03 |
| COL4A3    | 3208 | 0.02 | 0.03 | 0.03 | 0.03 | 0.03 | 0.03 | 0.03 | 0.05 | 0.05 |
| ITGA2     | 2789 | 0.02 | 0.02 | 0.02 | 0.02 | 0.04 | 0.03 | 0.03 | 0.04 | 0.04 |
| EPHB3     | 2160 | 0.05 | 0.02 | 0.02 | 0.02 | 0.04 | 0.03 | 0.03 | 0.05 | 0.09 |
| YES1      | 5397 | 0.03 | 0.03 | 0.02 | 0.02 | 0.03 | 0.03 | 0.02 | 0.02 | 0.02 |
| HSP90     | 117  | 0.03 | 0.03 | 0.02 | 0.02 | 0.03 | 0.03 | 0.02 | 0.03 | 0.03 |
| TNC       | 6205 | 0.06 | 0.02 | 0.02 | 0.02 | 0.03 | 0.02 | 0.02 | 0.12 | 0.12 |
| CYP1A1    | 2416 | 0.03 | 0.02 | 0.02 | 0.02 | 0.05 | 0.03 | 0.03 | 0.06 | 0.06 |
| PLXDC2    | 2776 | 0.04 | 0.02 | 0.03 | 0.03 | 0.05 | 0.03 | 0.04 | 0.04 | 0.07 |
| TGFA      | 2892 | 0.02 | 0.03 | 0.02 | 0.02 | 0.03 | 0.03 | 0.03 | 0.04 | 0.03 |
| TNFRSF10B | 3222 | 0.03 | 0.03 | 0.02 | 0.02 | 0.03 | 0.03 | 0.03 | 0.03 | 0.05 |
| AHR       | 92   | 0.03 | 0.04 | 0.02 | 0.02 | 0.03 | 0.03 | 0.03 | 0.05 | 0.05 |
| CN2D      | 2329 | 0.04 | 0.02 | 0.03 | 0.03 | 0.04 | 0.03 | 0.03 | 0.05 | 0.03 |
| PKRARIA1  | 2791 | 0.04 | 0.02 | 0.04 | 0.03 | 0.04 | 0.03 | 0.03 | 0.03 | 0.06 |
| TGFR3     | 1085 | 0.03 | 0.02 | 0.02 | 0.02 | 0.04 | 0.03 | 0.03 | 0.03 | 0.04 |
| KIT       | 3314 | 0.03 | 0.03 | 0.03 | 0.03 | 0.03 | 0.03 | 0.03 | 0.03 | 0.04 |
| KIT       | 4019 | 0.03 | 0.03 | 0.03 | 0.03 | 0.03 | 0.03 | 0.03 | 0.06 | 0.06 |
| NTRK3     | 4234 | 0.07 | 0.05 | 0.02 | 0.02 | 0.03 | 0.03 | 0.03 | 0.03 | 0.06 |
| GLYCD2    | 2999 | 0.04 | 0.03 | 0.03 | 0.03 | 0.04 | 0.03 | 0.03 | 0.05 | 0.08 |
| CDKN2A    | 6140 | 0.04 | 0.03 | 0.03 | 0.03 | 0.03 | 0.03 | 0.03 | 0.03 | 0.03 |
| MMP12     | 5695 | 0.03 | 0.03 | 0.02 | 0.02 | 0.03 | 0.03 | 0.03 | 0.03 | 0.03 |
| DLL1      | 4325 | 0.03 | 0.03 | 0.02 | 0.02 | 0.03 | 0.03 | 0.03 | 0.04 | 0.03 |
| MYCN      | 2802 | 0.03 | 0.03 | 0.03 | 0.03 | 0.04 | 0.03 | 0.04 | 0.04 | 0.04 |
| MEST      | 1390 | 0.07 | 0.03 | 0.04 | 0.02 | 0.03 | 0.03 | 0.03 | 0.04 | 0.04 |
| DAB2      | 3377 | 0.03 | 0.03 | 0.03 | 0.03 | 0.03 | 0.03 | 0.03 | 0.04 | 0.04 |
| SH3BP1    | 1485 | 0.03 | 0.03 | 0.02 | 0.02 | 0.03 | 0.03 | 0.03 | 0.03 | 0.03 |
| TFP2      | 2129 | 0.03 | 0.03 | 0.06 | 0.07 | 0.03 | 0.03 | 0.05 | 0.03 | 0.08 |
| SRFP1     | 1946 | 0.04 | 0.05 | 0.03 | 0.03 | 0.03 | 0.03 | 0.04 | 0.04 | 0.07 |
| LCR10     | 182  | 0.03 | 0.02 | 0.02 | 0.02 | 0.04 | 0.03 | 0.06 | 0.02 | 0.03 |
| TCF7L2    | 1600 | 0.03 | 0.03 | 0.03 | 0.03 | 0.04 | 0.03 | 0.03 | 0.05 | 0.04 |
| PCMC      | 3241 | 0.03 | 0.03 | 0.03 | 0.03 | 0.03 | 0.03 | 0.03 | 0.03 | 0.04 |
| PEI1B     | 2612 | 0.05 | 0.04 | 0.04 | 0.03 | 0.03 | 0.03 | 0.03 | 0.04 | 0.04 |
| IRAK3     | 5691 | 0.04 | 0.03 | 0.04 | 0.03 | 0.03 | 0.03 | 0.03 | 0.04 | 0.04 |
| TJP2      | 2117 | 0.05 | 0.03 | 0.03 | 0.03 | 0.05 | 0.04 | 0.03 | 0.03 | 0.04 |
| SHF       | 1227 | 0.04 | 0.03 | 0.03 | 0.06 | 0.04 | 0.03 | 0.03 | 0.03 | 0.03 |
| IRAK3     | 5275 | 0.03 | 0.03 | 0.03 | 0.03 | 0.03 | 0.03 | 0.03 | 0.03 | 0.03 |
| IRF1      | 6907 | 0.03 | 0.06 | 0.05 | 0.03 | 0.03 | 0.03 | 0.03 | 0.04 | 0.06 |
| ADCYA1    | 41   | 0.02 | 0.03 | 0.04 | 0.03 | 0.05 | 0.03 | 0.03 | 0.04 | 0.06 |
| CN3A1     | 186  | 0.05 | 0.04 | 0.03 | 0.03 | 0.04 | 0.03 | 0.03 | 0.04 | 0.05 |
| EFNA1     | 1825 | 0.04 | 0.03 | 0.03 | 0.04 | 0.06 | 0.04 | 0.03 | 0.03 | 0.03 |
| FN1       | 3953 | 0.03 | 0.03 | 0.03 | 0.04 | 0.06 | 0.04 | 0.03 | 0.03 | 0.03 |
| EPHA5     | 2055 | 0.03 | 0.03 | 0.03 | 0.03 | 0.04 | 0.03 | 0.03 | 0.03 | 0.03 |
| AREG      | 101  | 0.03 | 0.03 | 0.03 | 0.03 | 0.04 | 0.03 | 0.04 | 0.06 | 0.04 |
| APP       | 3007 | 0.03 | 0.04 | 0.03 | 0.03 | 0.04 | 0.03 | 0.04 | 0.06 | 0.04 |
| VEGFB     | 6107 | 0.02 | 0.02 | 0.02 | 0.02 | 0.04 | 0.03 | 0.03 | 0.04 | 0.06 |
| HIF1      | 5940 | 0.03 | 0.03 | 0.02 | 0.02 | 0.03 | 0.03 | 0.03 | 0.03 | 0.03 |
| RET       | 6103 | 0.05 | 0.04 | 0.03 | 0.03 | 0.05 | 0.03 | 0.03 | 0.05 | 0.05 |
| CDK2      | 2360 | 0.03 | 0.05 | 0.03 | 0.03 | 0.04 | 0.05 | 0.03 | 0.05 | 0.04 |
| MAPK14    | 4072 | 0.06 | 0.02 | 0.04 | 0.03 | 0.04 | 0.03 | 0.07 | 0.03 | 0.07 |
| STGAL1    | 2051 | 0.03 | 0.03 | 0.03 | 0.03 | 0.04 | 0.03 | 0.05 | 0.03 | 0.04 |
| WNT5      | 2086 | 0.06 | 0.03 | 0.03 | 0.03 | 0.04 | 0.03 | 0.05 | 0.03 | 0.09 |
| TESK2     | 2361 | 0.06 | 0.03 | 0.04 | 0.04 | 0.03 | 0.02 | 0.02 | 0.02 | 0.02 |
| TFAP2C    | 6048 | 0.03 | 0.04 | 0.03 | 0.03 | 0.04 | 0.04 | 0.03 | 0.06 | 0.08 |
| ENC1      | 3517 | 0.04 | 0.03 | 0.03 | 0.03 | 0.04 | 0.04 | 0.04 | 0.05 | 0.04 |
| BMP2      | 1938 | 0.06 | 0.03 | 0.03 | 0.03 | 0.04 | 0.05 | 0.03 | 0.03 | 0.04 |
| HSP90     | 1955 | 0.03 | 0.03 | 0.03 | 0.03 | 0.04 | 0.04 | 0.03 | 0.03 | 0.04 |
| EGFR      | 2434 | 0.03 | 0.03 | 0.04 | 0.04 | 0.04 | 0.03 | 0.04 | 0.05 | 0.06 |
| TMEM2     | 6130 | 0.04 | 0.04 | 0.02 | 0.04 | 0.03 | 0.04 | 0.02 | 0.05 | 0.1  |
| HPSE      | 2252 | 0.03 | 0.04 | 0.04 | 0.04 | 0.07 | 0.04 | 0.03 | 0.03 | 0.02 |
| ESR1      | 4092 | 0.03 | 0.04 | 0.03 | 0.03 | 0.07 | 0.03 | 0.04 | 0.05 | 0.07 |
| IRAK3     | 4982 | 0.04 | 0.04 | 0.03 | 0.04 | 0.03 | 0.03 | 0.03 | 0.05 | 0.06 |
| NOX1      | 274  | 0.03 | 0.04 | 0.03 | 0.04 | 0.03 | 0.04 | 0.04 | 0.05 | 0.04 |
| SEZL6     | 1935 | 0.03 | 0.03 | 0.03 | 0.03 | 0.05 | 0.04 | 0.04 | 0.03 | 0.03 |
| TGFB1     | 4295 | 0.03 | 0.04 | 0.03 | 0.04 | 0.04 | 0.04 | 0.03 | 0.05 | 0.03 |
| PCMC      | 3805 | 0.04 | 0.03 | 0.05 | 0.05 | 0.04 | 0.03 | 0.03 | 0.04 | 0.04 |
| WNT5B     | 5396 | 0.03 | 0.03 | 0.03 | 0.03 | 0.03 | 0.03 | 0.03 | 0.03 | 0.03 |
| FANCF     | 1330 | 0.04 | 0.04 | 0.04 | 0.03 | 0.04 | 0.04 | 0.04 | 0.03 | 0.04 |
| DST       | 4843 | 0.03 | 0.04 | 0.03 | 0.03 | 0.04 | 0.03 | 0.03 | 0.05 | 0.04 |
| PSP1      | 2795 | 0.03 | 0.03 | 0.02 | 0.02 | 0.04 | 0.04 | 0.05 | 0.02 | 0.06 |
| HLF       | 678  | 0.03 | 0.03 | 0.04 | 0.05 | 0.04 | 0.04 | 0.04 | 0.02 | 0.06 |
| SOX1      | 5940 | 0.04 | 0.04 | 0.03 | 0.04 | 0.03 | 0.04 | 0.03 | 0.03 | 0.05 |
| CDKN1A    | 4066 | 0.04 | 0.04 | 0.04 | 0.04 | 0.03 | 0.04 | 0.03 | 0.03 | 0.05 |
| CDKN1A    | 2370 | 0.07 | 0.03 | 0.04 | 0.04 | 0.04 | 0.03 | 0.03 | 0.03 | 0.03 |
| ICAM1     | 5884 | 0.03 | 0.04 | 0.04 | 0.04 | 0    |      |      |      |      |
